# Supplementary material for: Patienten mit Diabetes mellitus in der ambulanten psychotherapeutischen Versorgung
Source: Springer Nature journal article supplement (doi:10.1007/s00278-023-00644-y), 2023-02-06
Supplement: MOESM1 [file 23996960]

Tabelle 1. Soziodemographie für Psychotherapie-Patienten mit Diabetes mellitus und Psychotherapie-Patienten ohne chronische körperliche Erkrankung.

|                                    | Psychotherapie-Patienten mit Diabetes mellitus (n=104) |        | Psychotherapie-Patienten ohne chronische körperliche Erkrankung (n=947) |        |
|------------------------------------|--------------------------------------------------------|--------|-------------------------------------------------------------------------|--------|
|                                    | M                                                      | (SD)   | M                                                                       | (SD)   |
| Alter                              | 54,1                                                   | (1,3)  | 41,8                                                                    | (0,5)  |
|                                    | n                                                      | (%)    | n                                                                       | (%)    |
| Geschlecht                         |                                                        |        |                                                                         |        |
| männlich                           | 51                                                     | (49,4) | 369                                                                     | (38,9) |
| weiblich                           | 52                                                     | (50,6) | 578                                                                     | (61,1) |
| Familienstand                      |                                                        |        |                                                                         |        |
| ledig                              | 29                                                     | (27,6) | 463                                                                     | (48,9) |
| verheiratet/Lebenspartnerschaft    | 44                                                     | (42,9) | 353                                                                     | (37,3) |
| geschieden/verwitwet               | 31                                                     | (29,6) | 129                                                                     | (13,7) |
| Schulabschluss                     |                                                        |        |                                                                         |        |
| Hauptschulabschluss                | 24                                                     | (21,8) | 61                                                                      | (6,4)  |
| Realschulabschluss                 | 35                                                     | (35,6) | 239                                                                     | (25,2) |
| Allgemeine Hochschulreife          | 42                                                     | (40,1) | 632                                                                     | (66,7) |
| Anderer Schulabschluss             | 3                                                      | (2,6)  | 13                                                                      | (1,3)  |
| Aktuelle Lebenssituation           |                                                        |        |                                                                         |        |
| erwerbstätig                       | 40                                                     | (38,5) | 595                                                                     | (62,9) |
| arbeitssuchend                     | 14                                                     | (13,1) | 46                                                                      | (4,8)  |
| Erwerbsminderungsrente             | 16                                                     | (15,1) | 39                                                                      | (4,1)  |
| Altersrente                        | 23                                                     | (21,8) | 62                                                                      | (6,5)  |
| sonstiges <sup>1</sup>             | 12                                                     | (11,5) | 205                                                                     | (21,7) |
| Arbeitslos in den letzten 5 Jahren | 27                                                     | (25,6) | 223                                                                     | (23,5) |

Anmerkungen. <sup>1</sup>Schüler/Student, Hausfrau/Hausmann, Sonstiges.
