# Supplementary material for: Patienten mit Diabetes mellitus in der ambulanten psychotherapeutischen Versorgung
Source: Springer Nature journal article supplement (doi:10.1007/s00278-023-00644-y), 2023-02-06
Supplement: MOESM2 [file 23996960]

Tabelle 2. Zugangswege zu ambulanter Psychotherapie für Psychotherapie-Patienten mit Diabetes mellitus und Psychotherapie-Patienten ohne chronische körperliche Erkrankung.

|                                                | Psychotherapie-<br>Patienten mit<br>Diabetes mellitus<br>(n=104) | Psychotherapie-<br>Patienten ohne<br>chronische<br>körperliche<br>Erkrankung (n=947) |
|------------------------------------------------|------------------------------------------------------------------|--------------------------------------------------------------------------------------|
|                                                | n (%)                                                            | n (%)                                                                                |
| zu altem Therapeuten zurückgegangen            | 4 (3,5)                                                          | 26 (2,7)                                                                             |
| Empfehlung Arzt                                | 25 (24,5)                                                        | 241 (25,4)                                                                           |
| Empfehlung Klinik                              | 6 (5,8)                                                          | 45 (4,7)                                                                             |
| Terminservicestelle                            | 0 (0,0)                                                          | 5 (0,5)                                                                              |
| Krankenkasse                                   | 9 (8,6)                                                          | 40 (4,2)                                                                             |
| Kassenärztliche Vereinigung                    | 2 (2,0)                                                          | 33 (3,5)                                                                             |
| Psychotherapeutenkammer oder<br>Berufsverbände | 1 (1,1)                                                          | 23 (2,4)                                                                             |
| Familie, Freunde, Kollegen                     | 24 (22,9)                                                        | 242 (25,6)                                                                           |
| Beratungsstelle oder Selbsthilfegruppe         | 2 (2,4)                                                          | 28 (3,0)                                                                             |
| sonstige                                       | 41 (39,7)                                                        | 356 (37,6)                                                                           |
| Ich weiß nicht/keine Angabe                    | 0 (0,4)                                                          | 1 (0,1)                                                                              |

*Anmerkungen.* Angaben gewichtet nach Alter, Geschlecht und Bundesland.
