# Supplementary material for: Patienten mit Diabetes mellitus in der ambulanten psychotherapeutischen Versorgung
Source: Springer Nature journal article supplement (doi:10.1007/s00278-023-00644-y), 2023-02-06
Supplement: MOESM3 [file 23996960]

Tabelle 3. Beschwerden, die Psychotherapie-Patienten mit Diabetes mellitus veranlassten, therapeutische Hilfe zu suchen im Vergleich zu Psychotherapie-Patienten ohne chronische körperliche Erkrankung.

|                                                      | Psychotherapie-Patienten mit Diabetes mellitus (n=104) |        | Psychotherapie-Patienten ohne chronische körperliche Erkrankung (n=947) |        |
|------------------------------------------------------|--------------------------------------------------------|--------|-------------------------------------------------------------------------|--------|
|                                                      | n                                                      | (%)    | n                                                                       | (%)    |
| gedrückte/schwankende Stimmung                       | 89                                                     | (86,2) | 728                                                                     | (76,9) |
| Angststörungen                                       | 64                                                     | (61,4) | 455                                                                     | (48,1) |
| psychosomatische Beschwerden                         | 57                                                     | (54,6) | 437                                                                     | (46,2) |
| Bewältigung schwerer Belastungen                     | 51                                                     | (49,4) | 398                                                                     | (42,1) |
| Probleme im Umgang mit einer körperlichen Erkrankung | 47                                                     | (45,0) | 104                                                                     | (10,9) |
| Lern- und /oder Arbeitsstörungen                     | 41                                                     | (40,1) | 343                                                                     | (36,3) |
| andere Störungen/Probleme                            | 39                                                     | (37,8) | 273                                                                     | (28,8) |
| Probleme am Arbeitsplatz                             | 38                                                     | (36,2) | 308                                                                     | (32,6) |
| Probleme mit Kindern/Familienmitgliedern             | 32                                                     | (30,7) | 304                                                                     | (32,1) |
| Konflikte/Probleme in der Partnerschaft              | 28                                                     | (26,8) | 326                                                                     | (34,4) |
| Störungen des Essverhaltens                          | 20                                                     | (19,7) | 153                                                                     | (16,2) |
| Zwangshandlungen/-gedanken                           | 14                                                     | (14,0) | 154                                                                     | (16,3) |
| süchtiges Verhalten                                  | 12                                                     | (11,8) | 79                                                                      | (8,4)  |
| sexuelle Probleme/Funktionsstörungen                 | 12                                                     | (11,2) | 85                                                                      | (9,0)  |

*Anmerkungen.* Angaben gewichtet nach Alter, Geschlecht und Bundesland. Mehrfachnennung der Antwortkategorien möglich.
