# Supplementary material for: Patienten mit Diabetes mellitus in der ambulanten psychotherapeutischen Versorgung
Source: Springer Nature journal article supplement (doi:10.1007/s00278-023-00644-y), 2023-02-06
Supplement: MOESM4 [file 23996960]

Tabelle 4. Unerwünschte Nebenwirkungen durch Psychotherapie bei Psychotherapie-Patienten mit Diabetes mellitus im Vergleich zu Psychotherapie-Patienten ohne chronische körperliche Erkrankung.

|                                                                        | Psychotherapie-Patienten mit Diabetes mellitus (n=104) |        | Psychotherapie-Patienten ohne chronische körperliche Erkrankung (n=947) |        |
|------------------------------------------------------------------------|--------------------------------------------------------|--------|-------------------------------------------------------------------------|--------|
|                                                                        | n                                                      | (%)    | n                                                                       | (%)    |
| Unerwünschte Nebenwirkungen                                            |                                                        |        |                                                                         |        |
| ja                                                                     | 47                                                     | (45,7) | 384                                                                     | (40,6) |
| nein                                                                   | 54                                                     | (52,1) | 562                                                                     | (59,4) |
| Enttäuschung über Therapieverlauf/-ergebnis                            | 15                                                     | (14,5) | 164                                                                     | (17,3) |
| Stigmatisierung durch Andere                                           | 13                                                     | (13,0) | 74                                                                      | (7,8)  |
| Zunahme von Krankheitsfehlzeiten                                       | 12                                                     | (11,3) | 94                                                                      | (10,0) |
| Auftreten neuer Symptome                                               | 12                                                     | (11,3) | 81                                                                      | (8,6)  |
| ungünstige Auswirkungen auf die Arbeit                                 | 10                                                     | (9,8)  | 57                                                                      | (6,0)  |
| Auftreten/Zunahme suizidaler Gedanken oder Absichten                   | 8                                                      | (7,6)  | 56                                                                      | (5,9)  |
| Verschlechterung der psychischen Verfassung                            | 7                                                      | (7,1)  | 75                                                                      | (7,9)  |
| verschlechtertes Verhältnis zu Familie oder Freunden                   | 6                                                      | (5,7)  | 97                                                                      | (10,2) |
| ungünstige Auswirkungen auf die Beziehung zu Kollegen und Vorgesetzten | 5                                                      | (5,0)  | 55                                                                      | (5,8)  |
| Partnerschaftsprobleme oder Trennung                                   | 3                                                      | (2,9)  | 73                                                                      | (7,7)  |
| gesteigerter Alkohol- und/oder Drogenkonsum                            | 2                                                      | (2,1)  | 22                                                                      | (2,3)  |
| Abhängigkeitsgefühl vom Therapeuten                                    | 1                                                      | (0,7)  | 18                                                                      | (1,9)  |
| keine Angabe                                                           | 2                                                      | (2,2)  | 5                                                                       | (0,6)  |

Anmerkungen. Angaben gewichtet nach Alter, Geschlecht und Bundesland.
